# Supplementary material
Source: HighWire-hosted journal article supplement (https://www.cmaj.ca/highwire/filestream/57640/field_highwire_adjunct_files/1/enter-kumar_appendix_2.pdf)

## Appendix 2 (as supplied by the authors)

Relationship between duration of hospitalization and oseltamivir carboxylate trough concentrations ( $p = 0.063$ ). In addition, the coefficient of determination was 0.01 ( $R^2$ ) for duration of hospitalization and oseltamivir carboxylate area under the curve (AUC).

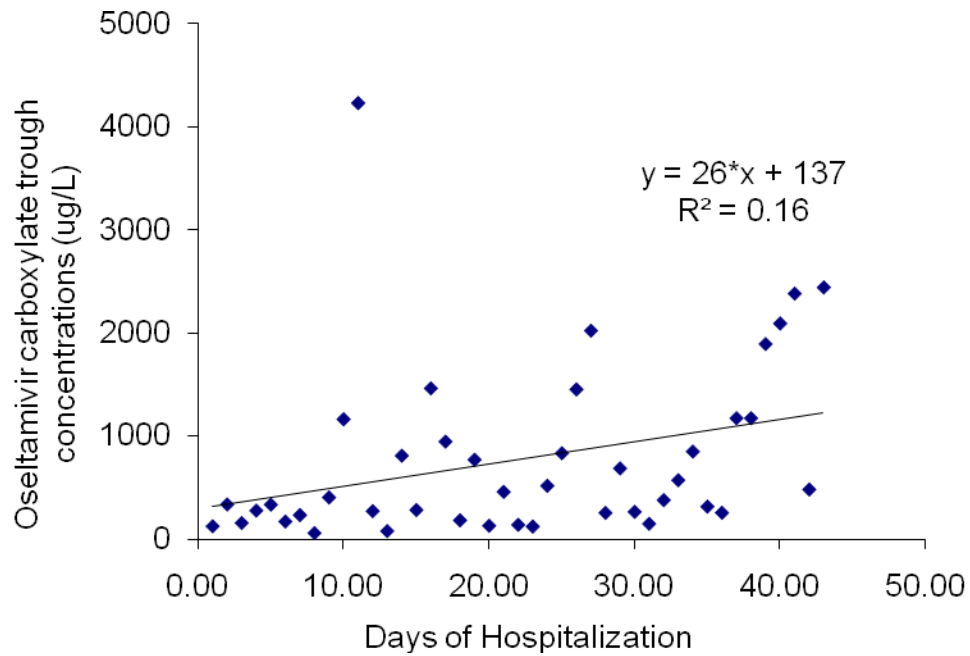

Supplement: enter-kumar_appendix_2.pdf [file enter-kumar_appendix_2.pdf]
